# Supplementary material
Source: PubMed Central journal article supplement (PMC7906752)
Supplement: mmc1.pdf [file mmc1.pdf]

# THE LANCET

## Respiratory Medicine

### Supplementary appendix

This appendix formed part of the original submission and has been peer reviewed.  
We post it as supplied by the authors.

Supplement to: Bajaj R, Sinclair HC, Patel K, et al. Delayed-onset myocarditis following COVID-19. *Lancet Respir Med* 2021; published online Feb 19.  
[http://dx.doi.org/10.1016/S2213-2600\(21\)00085-0](http://dx.doi.org/10.1016/S2213-2600(21)00085-0).

# Supplementary Material

## Table 1

| Age, Gender, Ethnicity, PMIH.                                                                                    |                                                                                                                    | Clinical Presentation                                                 |                                              |                                                                                  | ICU Support (length)                                                                                               |                                                                                                                                                                                                       |                                                                                      | Myocardial Imaging                      |                                                    | Lab. Results (peak values) |  | SARS-CoV-2 Results |  | ICU stay, outcome |
|------------------------------------------------------------------------------------------------------------------|--------------------------------------------------------------------------------------------------------------------|-----------------------------------------------------------------------|----------------------------------------------|----------------------------------------------------------------------------------|--------------------------------------------------------------------------------------------------------------------|-------------------------------------------------------------------------------------------------------------------------------------------------------------------------------------------------------|--------------------------------------------------------------------------------------|-----------------------------------------|----------------------------------------------------|----------------------------|--|--------------------|--|-------------------|
| Pre-admission/Proxime                                                                                            | Admission to hospital                                                                                              | ICU Referral                                                          | Mechanical                                   | Drug Therapy                                                                     | ICU admission                                                                                                      | CMR (when, RT level)                                                                                                                                                                                  | Lab. Results (peak values)                                                           | SARS-CoV-2 Results                      | ICU stay, outcome                                  |                            |  |                    |  |                   |
| Case 1: 42, male, South Asian, no PMIH                                                                           | 3 days fever, sweats, dizziness, dyspnoea, diarrhoea. Abdominal and palmoplantar rash.                             | Respiratory failure and cardiogenic shock                             | Ventilation (24 hrs)                         | Milrinone, adrenaline, BSA, acyclovir, methylprednisolone                        | TTE: Bi-ventricular impairment (LVEF 30%), CT: basal consolidation. Angiography: unobstructed coronaries.          | Scan 1 (ICU +4 days): Tnt 638ng/L; LVEF 40%, elevated T1, normal T2, no LGE. Scan 2 (4 months after discharge): Tnt 16154 mg/L; neutrophils 17x10 <sup>9</sup> /L.                                    | CRP 358 mg/L; Tnt 1576 ng/L; Ferritin 16154 mg/L; neutrophils 17x10 <sup>9</sup> /L. | RT-PCR: 3 x negative; antibody positive | 4 days; full recovery                              |                            |  |                    |  |                   |
| Case 2: 27, male; Black-Caribbean, no PMIH                                                                       | Admission with symptoms, PE. positive RT-PCR and normal Tnt. Discharged after 4 days and symptom free for 2 weeks. | Cardiogenic shock                                                     | Ventilation (9 hrs) VA ECMO (72 hours)       | Milrinone, noradrenaline, BSA, methylprednisolone                                | TTE: Bi-ventricular impairment (LVEF <40%). CT: lung consolidation, diaphragm.                                     | Scan 1 (ICU +14 days): Tnt 25ng/L; LVEF 70%, elevated T1, normal T2, epicardial LGE.                                                                                                                  | CRP 403 mg/L; Tnt 620 ng/L; Ferritin 1711 mg/L; neutrophils 11x10 <sup>9</sup> /L.   | RT-PCR: 7 x negative; antibody positive | 13 days; full recovery                             |                            |  |                    |  |                   |
| Case 3: 41, male; Black-African, no PMIH                                                                         | 4 days fever, dizziness, dyspnoea, abdominal pain, diarrhoea                                                       | Cardiogenic shock and refractory VF. Biventricular pattern ECG.       | Ventilation (48 hrs)                         | Adrenaline, noradrenaline, BSA, hydrocortisone                                   | TTE: Bi-ventricular impairment (LVEF 30%). CXR: bilateral changes. Angiography: unobstructed coronaries.           | Scan 1 (ICU +6 days): Tnt 270ng/L; LVEF 69%, elevated T1 and T2. Scan 2 (10 weeks after discharge): Tnt 8ng/L; LVEF 67%, normal T1, T2, no LGE.                                                       | CRP 327 mg/L; Tnt 270 ng/L; Ferritin 3893 mg/L; neutrophils 46.5x10 <sup>9</sup> /L. | RT-PCR: 4 x negative; antibody positive | 4 days; full recovery                              |                            |  |                    |  |                   |
| Case 4: 53, male; Black-African; hypertension, obesity, chronic kidney disease                                   | 4 days fever, malaise, dyspnoea. Conjunctival keratopathy and tongue changes.                                      | Cardiogenic shock                                                     | Ventilation (16 days), VA and VV ECMO 7 days | Adrenaline, vasopressin, milrinone, BSA, oseltamivir, hydrocortisone             | TTE: Bi-ventricular impairment (LVEF 15%). CXR: bilateral changes.                                                 | Scan 1 (ICU +23 days): Tnt 54ng/L; LVEF 42%, elevated T1 and T2; midwall/epicardial LGE. Scan 2 (6 months after discharge): Tnt 49ng/L; LVEF 27%, elevated T1 and T2; midwall/epicardial LGE.         | CRP 461 mg/L; Tnt 574 ng/L; Ferritin 6461 mg/L; neutrophils 23x10 <sup>9</sup> /L.   | RT-PCR: 6 x negative; antibody positive | 18 days; NYHA 2-3                                  |                            |  |                    |  |                   |
| Case 5: 33, male; Black-African, smoker, no other PMIH.                                                          | 7 days abdominal pain, dyspnoea, diarrhoea and confusion. Skin rash.                                               | Cardiogenic shock                                                     | None                                         | Dobutamine, adrenaline, BSA                                                      | TTE: Bi-ventricular impairment (LVEF <30%). CT: bilateral lung consolidation and colitis descending/spinal colitis | Scan 1 (ICU +10 days): Tnt 72ng/L; LVEF 69%, elevated T1 and T2, midwall septal LGE. Scan 2 (14 weeks after discharge): LVEF 71%, normal T1 and T2, resolution of LGE.                                | CRP 253 mg/L; Tnt 242 ng/L; Ferritin 3528 mg/L; neutrophils 34x10 <sup>9</sup> /L.   | RT-PCR: 3 x negative; antibody positive | 4 days; full recovery                              |                            |  |                    |  |                   |
| Case 6: 23, female; Black-African, 8 weeks pregnant.                                                             | 5 days fever, rigors, abdominal pain and PV bleeding. Rash on soles, face and back. Spontaneous abortion.          | Cardiogenic shock                                                     | Ventilation (15 days)                        | Noradrenaline, adrenaline, vasopressin, milrinone, BSA, IVIG and hydrocortisone  | TTE: Bi-ventricular impairment (LVEF <35%). CT: bilateral lung consolidation and colitis                           | Scan 1 (ICU +24 days): Tnt 34ng/L; LVEF 58%, borderline elevated T1, normal T2, no LGE.                                                                                                               | CRP 335 mg/L; Tnt 90 ng/L; Ferritin 5835 mg/L; neutrophils 20x10 <sup>9</sup> /L.    | RT-PCR: 8 x negative; antibody positive | 25 days; no follow-up data                         |                            |  |                    |  |                   |
| Case 7: 33, male; Black-Caribbean, no PMIH                                                                       | 4 days myalgia, fever, headaches and diarrhea                                                                      | Respiratory failure and cardiogenic shock                             | Ventilation (4 days)                         | Milrinone, noradrenaline, levosimendan, BSA, IVIG, aciclovir, methylprednisolone | TTE: Bi-ventricular impairment (LVEF 25%). CXR: bilateral lung changes. CTCA normal                                | Scan 1 (ICU +8 days): Tnt 34ng/L; LVEF 57%, normal T1 and T2, epicardial LGE.                                                                                                                         | CRP 379 mg/L; Tnt 431 ng/L; Ferritin 1356 mg/L; neutrophils 20x10 <sup>9</sup> /L.   | RT-PCR: 4 x negative; antibody positive | 6 days; full recovery                              |                            |  |                    |  |                   |
| Case 8: 33, female; South-Asian; gestational diabetes, C-section at 36 weeks gestation.                          | Chest pain, dyspnoea, desaturation 24 hours following elective c-section.                                          | Cardiogenic shock                                                     | None                                         | Levosimendan                                                                     | TTE: Bi-ventricular impairment (LVEF <15%). CT: Lung consolidation, no PE. CTCA: no stenoses.                      | Scan 1 (ICU +3 days): Tnt 72ng/L; LVEF 62%, elevated T1 and T2; extensive midwall and epicardial LGE. Scan 2 (6 weeks after discharge): LVEF 65%, normal T1 and T2, resolution of LGE.                | CRP 190 mg/L; Tnt 406 ng/L; Ferritin 111 mg/L; neutrophils 13x10 <sup>9</sup> /L.    | RT-PCR: 3 x negative; antibody negative | 4 days; full recovery                              |                            |  |                    |  |                   |
| Case 9: 36, male; Black-African, no PMIH                                                                         | 7 day fever, headache and malaise, 2 days vomiting, upper abdominal pain and loose stools.                         | Cardiogenic shock                                                     | None                                         | None                                                                             | TTE: Bi-ventricular impairment (LVEF <35%). CXR: subtle bibasal changes                                            | Scan 1 (ICU +4 days): LVEF 58%, elevated T2, extensive midwall LGE.                                                                                                                                   | CRP 222 mg/L; Tnt 2704 ng/L; Ferritin 3847 mg/L; neutrophils 10x10 <sup>9</sup> /L.  | RT-PCR: 3 x negative; antibody negative | 1 day; no follow up data                           |                            |  |                    |  |                   |
| Case 10: 21, male; Black-African; asthma and family history of dilated cardiomyopathy and premature sudden death | 2-4 weeks dyspnoea, peripheral oedema, chest pain                                                                  | Cardiogenic shock                                                     | None                                         | Milrinone, BSA, methylprednisolone                                               | TTE: Bi-ventricular impairment (LVEF 15%). CT: pulmonary oedema +/- consolidation.                                 | No scan obtained. Epiant heart: extensive fibrotic changes, no inflammatory infiltrates. Genetic test pending.                                                                                        | CRP 103mg/L; Tnt 95 ng/L; Ferritin 182 mg/L; neutrophils 10x10 <sup>9</sup> /L.      | RT-PCR: 5 x negative; antibody positive | 2 days; cardiac transplant 20 days after admission |                            |  |                    |  |                   |
| Case 11: 39, male; Black-African; DM II, CKD, obesity, perforated duodenal ulcer                                 | 3 days dyspnoea, pedal and armial oedema                                                                           | Respiratory failure                                                   | None                                         | BSA, esolcanavir                                                                 | TTE: Bi-ventricular impairment (LVEF <15%). CT: multifocal ground glass changes.                                   | Scan 1 (ICU +15 days): LVEF 16%, mildly elevated T1, normal T2, no LGE.                                                                                                                               | CRP 34ng/L; Tnt 95 ng/L; Ferritin 1074 mg/L; neutrophils 4x10 <sup>9</sup> /L.       | RT-PCR: 1 x negative; antibody positive | 2 days; chronic heart failure symptoms             |                            |  |                    |  |                   |
| Case 12: 20, female; Black-African; no PMIH                                                                      | 1 month chest pain and worsening dyspnoea and orthopnoea                                                           | Mobitz 2 AV block, hypotension on monitoring following cardiac biopsy | None                                         | methylprednisolone                                                               | TTE: Bi-ventricular impairment (LVEF <45%). CXR: pleural effusions                                                 | Scan 1 (ICU -1 day): Tnt 274ng/L; LVEF 33%, very elevated T1 and T2, no LGE. Scan 2 (ICU +6 days): Tnt 38ng/L; LVEF 66%, mildly elevated T1 and T2, no LGE. EMB (ICU day 0): lymphocytic myocarditis. | CRP 5mg/L; Tnt 2741 ng/L; Ferritin 92 mg/L; neutrophils 4x10 <sup>9</sup> /L.        | RT-PCR: 3 x negative; antibody positive | 1 day; no follow up data                           |                            |  |                    |  |                   |

**Table 1:** Case summaries including Subjects (cases 1-9) and Controls (cases 10-12).

BSA – broad spectrum antibiotics, CMR – cardiac magnetic resonance imaging, CT – computed tomography, CTCA – CT coronary angiogram, CXR – chest x-ray, ECMO – extracorporeal membrane oxygenation as veno-veno (VV) or veno-arterial (VA), EMB – endomyocardial biopsy, ICU - intensive care unit, LGE – late gadolinium enhancement, LV – left ventricle, PE – pulmonary emboli, PMH – past medical history, TTE – transthoracic echocardiography.
